# Supplementary material for: Broadband spectra with fluorescence and phosphorescence dual emission from bichromophoric platinum metallomesogens containing a 6,12-dihydro-indeno[1,2-b]fluorene linkage
Source: Royal Society of Chemistry journal article supplement (doi:10.1039/c6ra03391a), 2016-01-01

## *Supporting information*

### **Broadband Spectra with Fluorescence and Phosphorescence Dual Emission from Bichromophoric Platinum Metallomesogens Containing 6,12-Dihydro-indeno[1,2-b]fluorene Linkage**

Yafei Wang<sup>†</sup>\*, Jiang Fan<sup>†</sup>, Tianyi Li<sup>‡</sup>, Qiong Wang<sup>†</sup>, Junwei Shi<sup>†</sup>, Zuoming Qu<sup>†</sup>, Hua Tan<sup>†</sup>,  
Yu Liu<sup>†</sup>, Weiguo Zhu<sup>∇</sup>\*

<sup>†</sup>*College of Chemistry, Key Lab of Environment-Friendly Chemistry and Application of the Ministry of Education,  
Xiangtan University, Xiangtan 411105, China*

<sup>‡</sup>*School of Chemistry and Chemical Engineering, Nanjing University, Nanjing 210093, PR China*

<sup>∇</sup>*School of Materials Science & Engineering, Changzhou University, Changzhou 213164, PR China*

<sup>||</sup>*Institute of Polymer Optoelectronic Materials and Devices, State Key Laboratory of Luminescent Materials and  
Devices, South China University of Technology, Guangzhou 510640, China*

<sup>Δ</sup>*The authors contributed equally to this work.*

\*To whom correspondence should be addressed

(W. Zhu) [zhuwg18@126.com](mailto:zhuwg18@126.com)

(Y. Wang) [qiji830404@hotmail.com](mailto:qiji830404@hotmail.com)

## Contents

### Experimental section

**Table S1.** Phase Transitions of the platinum complexes

**Figure S1.** TAG traces of FJ-1 and FJ-2

**Figure S2.** DSC traces obtained for the first and second heating and first cooling cycles of FJ-1 and FJ-2 at a rate of  $10^{\circ}\text{C min}^{-1}$ .

**Figure S3.** POM images of FJ-1 (left,  $168^{\circ}\text{C}$ ) and FJ-2 (right,  $120^{\circ}\text{C}$ ) upon cooling process

**Figure S4.** UV-vis absorption spectra of the FJ-1 (black) and FJ-2 (red) measured in  $\text{CH}_2\text{Cl}_2$  ( $1 \times 10^{-6}$  M) at room temperature

**Figure S5.** PL spectra of FJ-2 in solution both in air and  $\text{N}_2$  at RT upon excitation of 460 nm

**Figure S6.** PL spectra of FJ-2 in different degassed solution at RT upon excitation of 460 nm

**Figure S7** Emission of cyclometallating ligand in  $\text{CH}_2\text{Cl}_2$  at room temperature (red) and 77K (black)

**Figure S8.** PL spectra of FJ-1 and FJ-2 in neat film at RT upon excitation of 460 nm

**Figure S9.** TA decay for FJ-1, following 525 nm pulsed laser excitation in degassed  $\text{CH}_2\text{Cl}_2$

**Figure S10.** TA decay for FJ-2, following 525 nm pulsed laser excitation in degassed  $\text{CH}_2\text{Cl}_2$

**Figure S11.** The simulated absorption spectra of FJ-1 together with the Osc. Strength

**Table S2.** Natural Transition orbitals representing the main absorption bands of FJ-1

**Figure S12.** CV curves of platinum complexes measured in  $\text{CH}_2\text{Cl}_2$  solution

**$^1\text{H}$  NMR and TOF-MS spectra**

**Table S1.** Phase Transitions of the platinum complexes<sup>a, b</sup>

| Compound | T(°C) (H (kJ mol <sup>-1</sup> )) |       |
|----------|-----------------------------------|-------|
|          | Phase                             | Phase |
| FJ-1     | Cr 188 (7.4) Sm 220 (27.9)        | Iso   |
| FJ-2     | Cr 75 Cr' 82 Sm 193 (3.8)         | Iso   |

<sup>a</sup>The data collected from second heating with a rate of 10 °C min<sup>-1</sup>. <sup>b</sup>The phase transitions temperature represent the peak. Phase nomenclature: Cr = crystal, Cr' = glass transition, Sm = smectic mesophase, Iso = isotropic liquid.

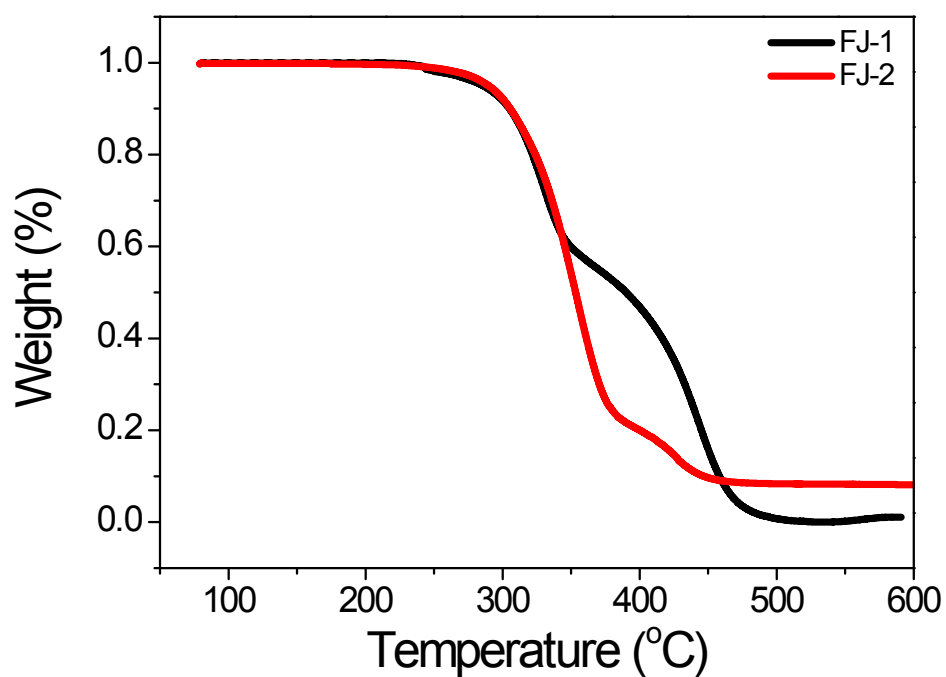

**Figure S1.** TAG traces of FJ-1 and FJ-2

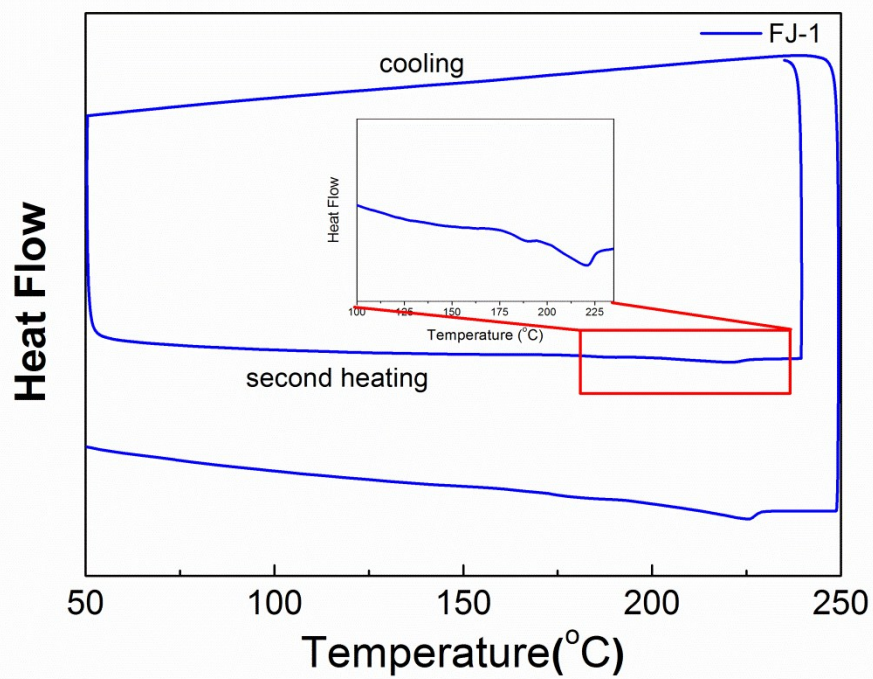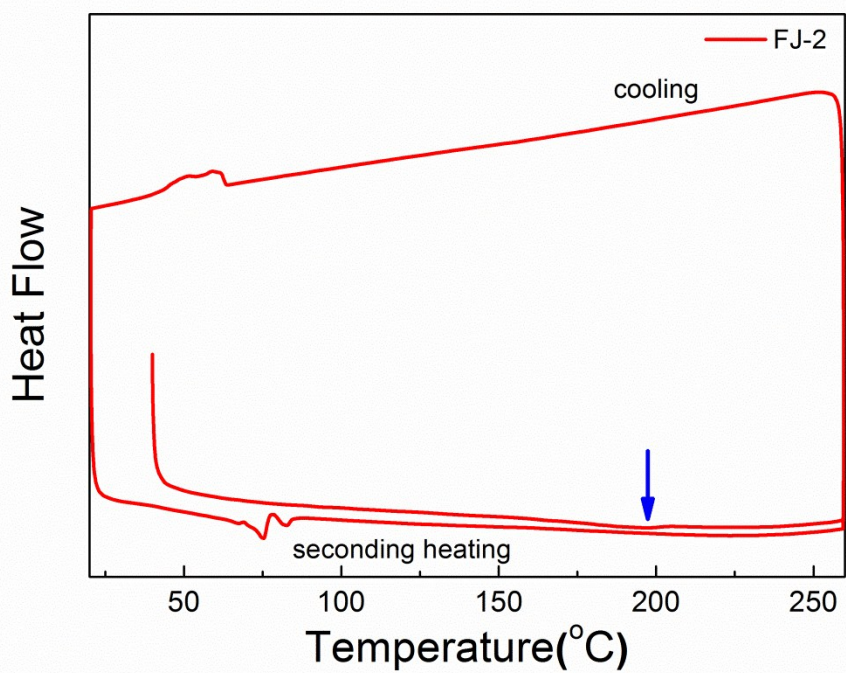

**Figure S2.** DSC traces obtained for the first and second heating and first cooling cycles of FJ-1 and FJ-2 at a rate of  $10^{\circ}\text{C min}^{-1}$ .

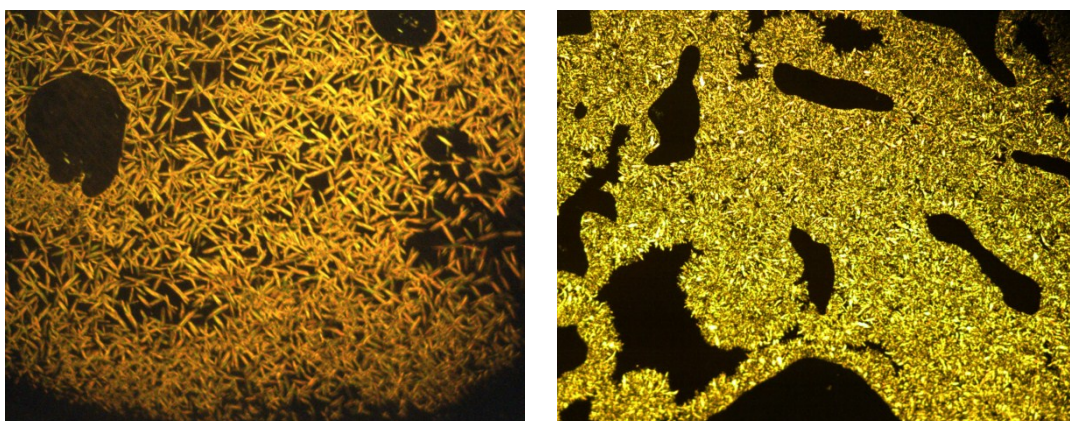

**Figure S3.** POM images of FJ-1 (left, 168°C) and FJ-2 (right, 120°C) upon cooling process

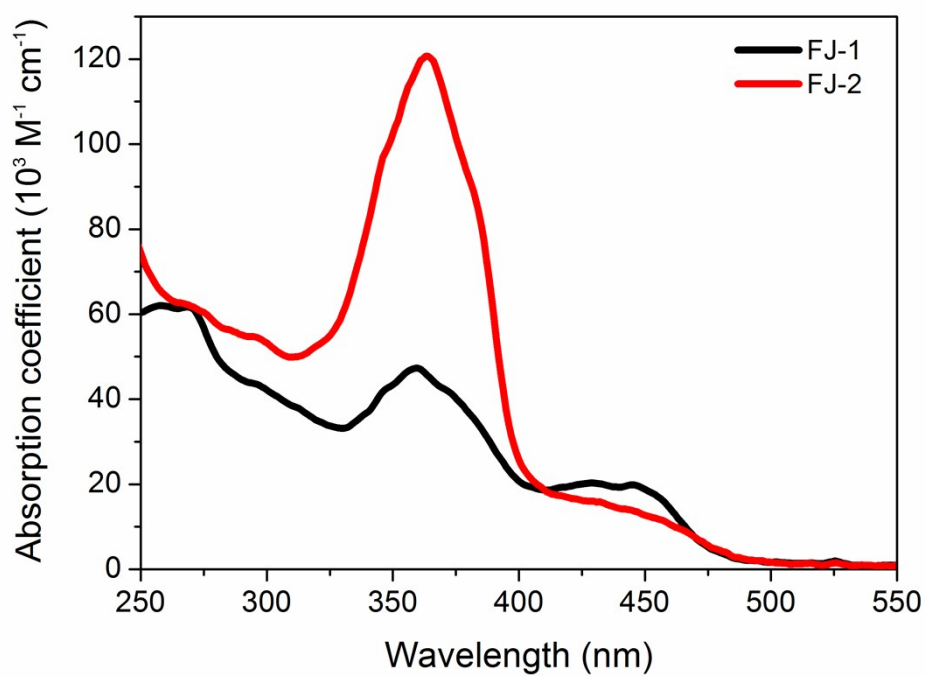

**Figure S4.** UV-vis absorption spectra of the FJ-1 (black) and FJ-2 (red) measured in CH<sub>2</sub>Cl<sub>2</sub> (1 × 10<sup>-6</sup> M) at room temperature



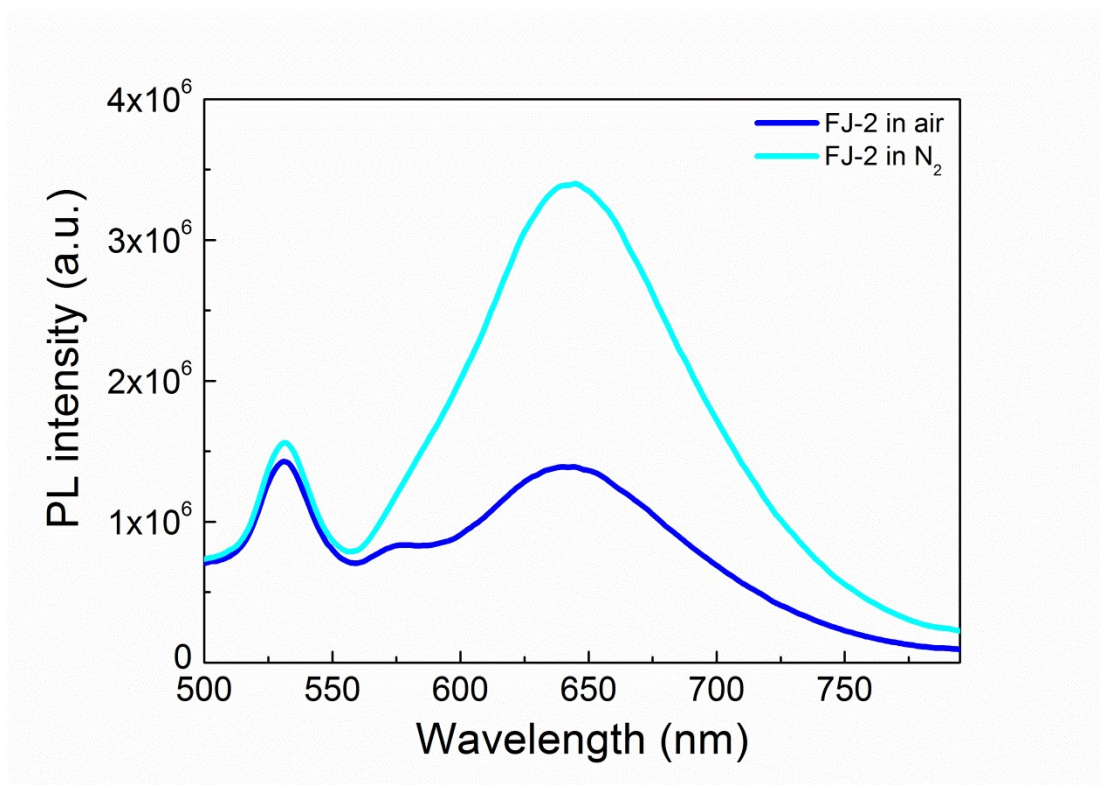

**Figure S5.** PL spectra of FJ-2 in solution both in air and N<sub>2</sub> at RT upon excitation of 460 nm

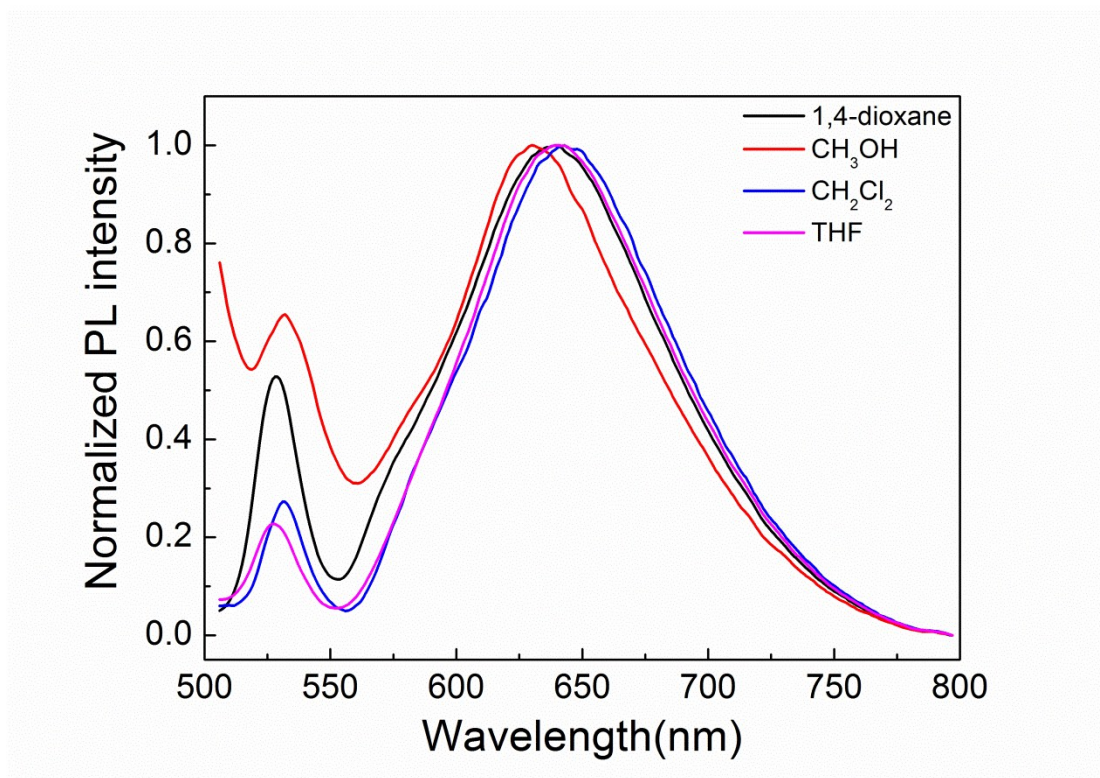

**Figure S6.** PL spectra of FJ-2 in different degassed solution at RT upon excitation of 460 nm

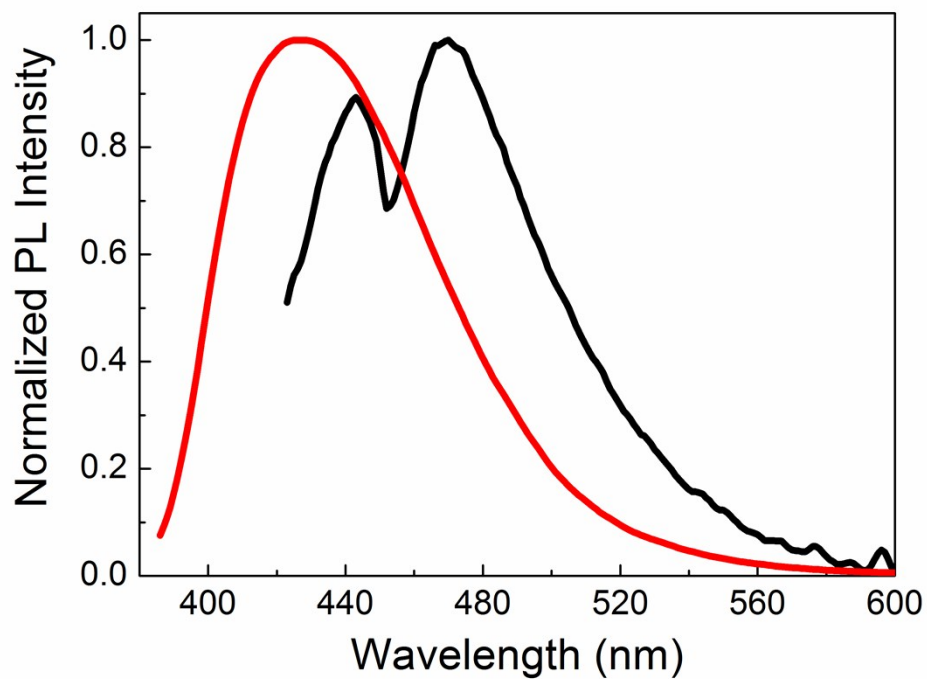

**Figure S7** Emission of cyclometallating ligand in  $\text{CH}_2\text{Cl}_2$  at room temperature (red) and 77K (black)

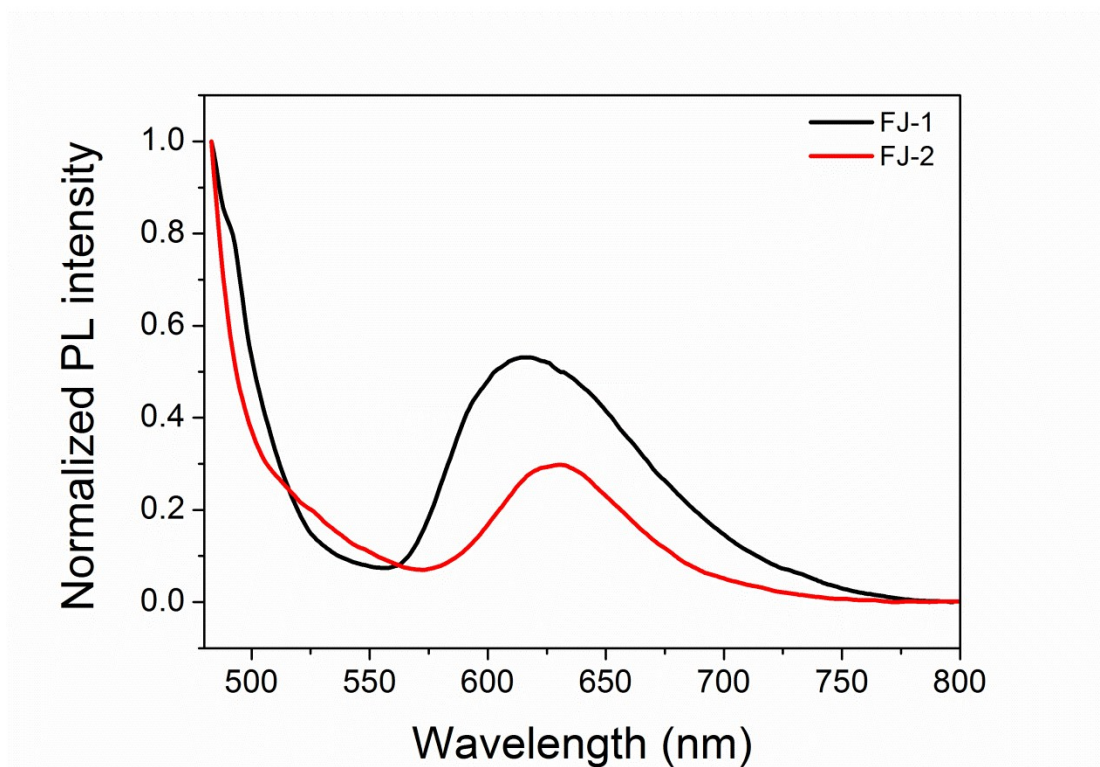

**Figure S8.** PL spectra of FJ-1 and FJ-2 in neat film at RT upon excitation of 460 nm

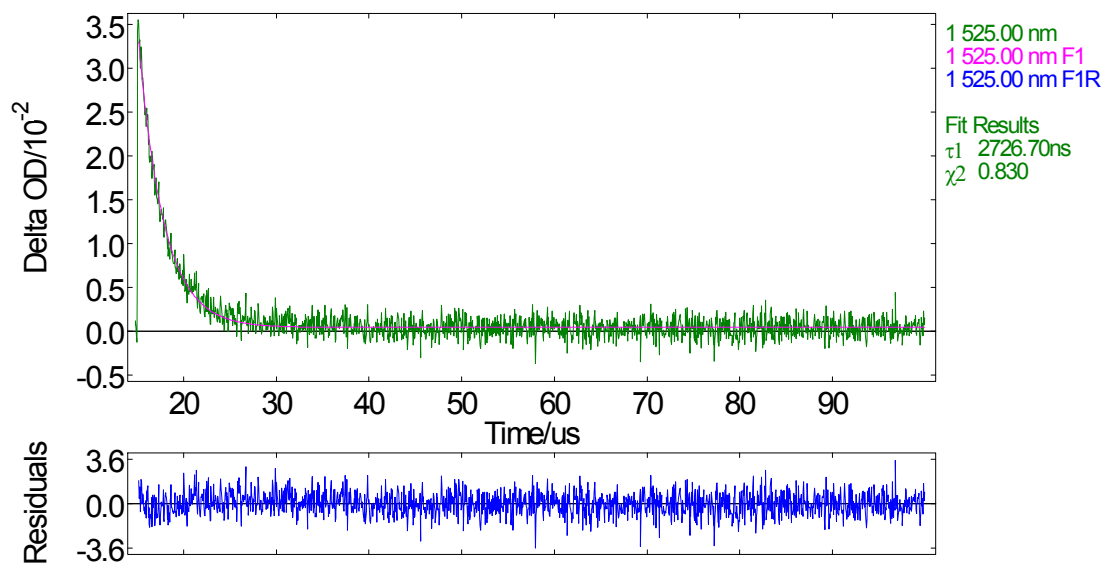

**Figure S9.** TA decay for FJ-1, following 525 nm pulsed laser excitation in degassed  $\text{CH}_2\text{Cl}_2$

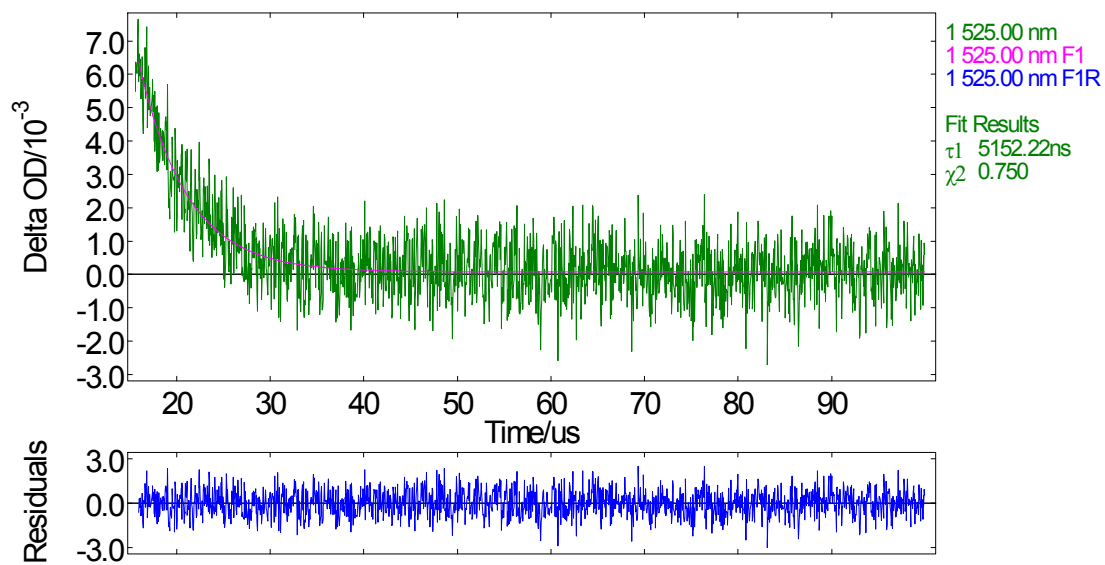

**Figure S10.** TA decay for FJ-2, following 525 nm pulsed laser excitation in degassed  $\text{CH}_2\text{Cl}_2$



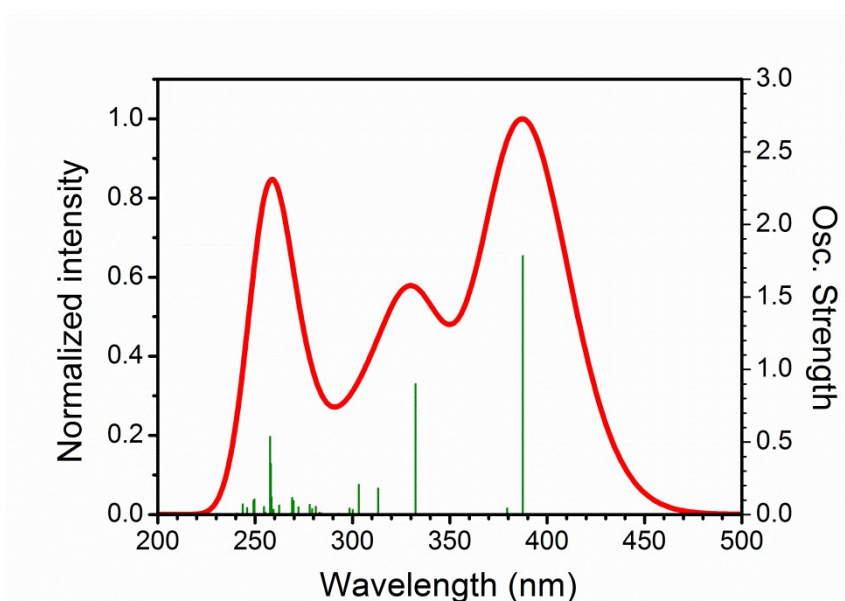

**Figure S11.** The simulated absorption spectra of FJ-1 together with the Osc. Strength.

**Table S2.** Natural Transition orbitals representing the main absorption bands of FJ-1

| Wavelength/nm | Osc. Strength | Major contribution                                                |
|---------------|---------------|-------------------------------------------------------------------|
| 387.5         | 1.7859        | HOMO->LUMO (45%) HOMO-1->LUMO+1(33%)                              |
| 332.4         | 0.9026        | HOMO-2->LUMO (30%) HOMO->LUMO (15%)<br>HOMO->LUMO+2 (22%)         |
| 313.2         | 0.1843        | HOMO-3->LUMO (22%) HOMO-2->LUMO+1<br>(16%), HOMO->LUMO+1 (11%)    |
| 303.3         | 0.2086        | HOMO-4->LUMO (20%) HOMO-3->LUMO+1<br>(23%), HOMO->LUMO+2 (11%)    |
| 269.0         | 0.1186        | HOMO->LUMO+7 (13%)                                                |
| 258.5         | 0.122         | HOMO->LUMO+12 (12%)                                               |
| 258.1         | 0.3522        | HOMO-1->LUMO+10 (10%)                                             |
| 257.8         | 0.5387        | HOMO->LUMO+9 (10%)                                                |
| 249.7         | 0.1073        | HOMO-1->LUMO+7 (12%), HOMO-1->LUMO+8<br>(22%), HOMO->LUMO+8 (11%) |

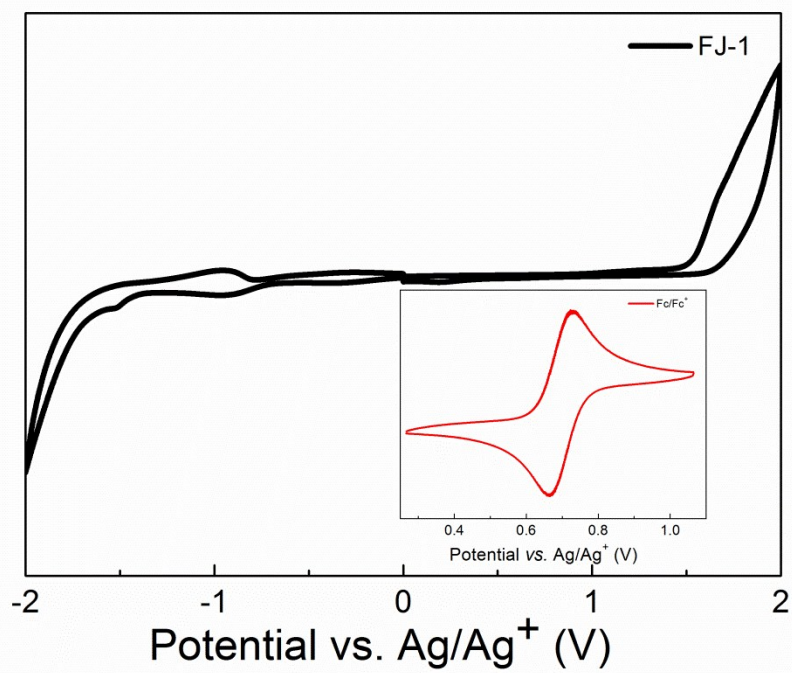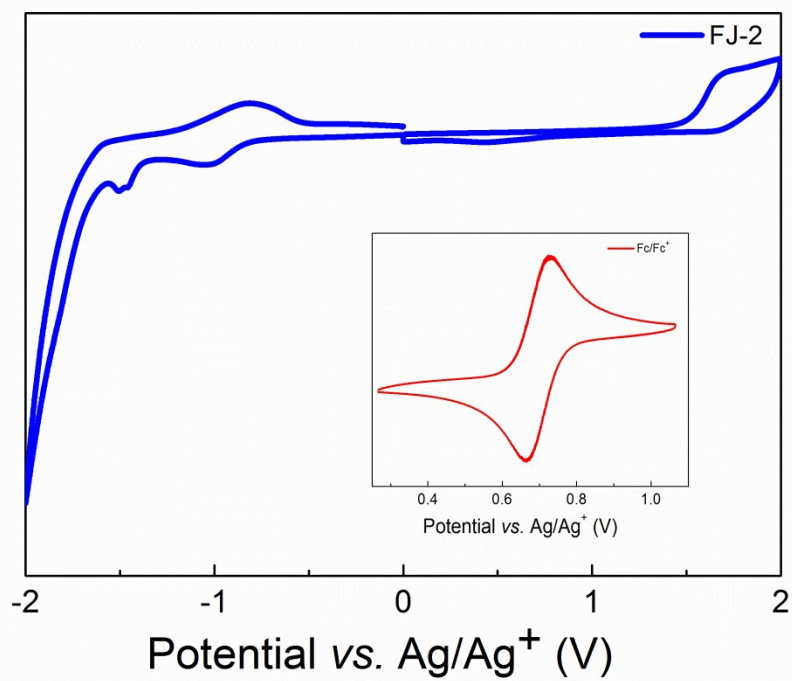

**Figure S12.** CV curves of platinum complexes measured in  $\text{CH}_2\text{Cl}_2$  solution.

# *<sup>1</sup>H NMR and TOF-MS spectra*

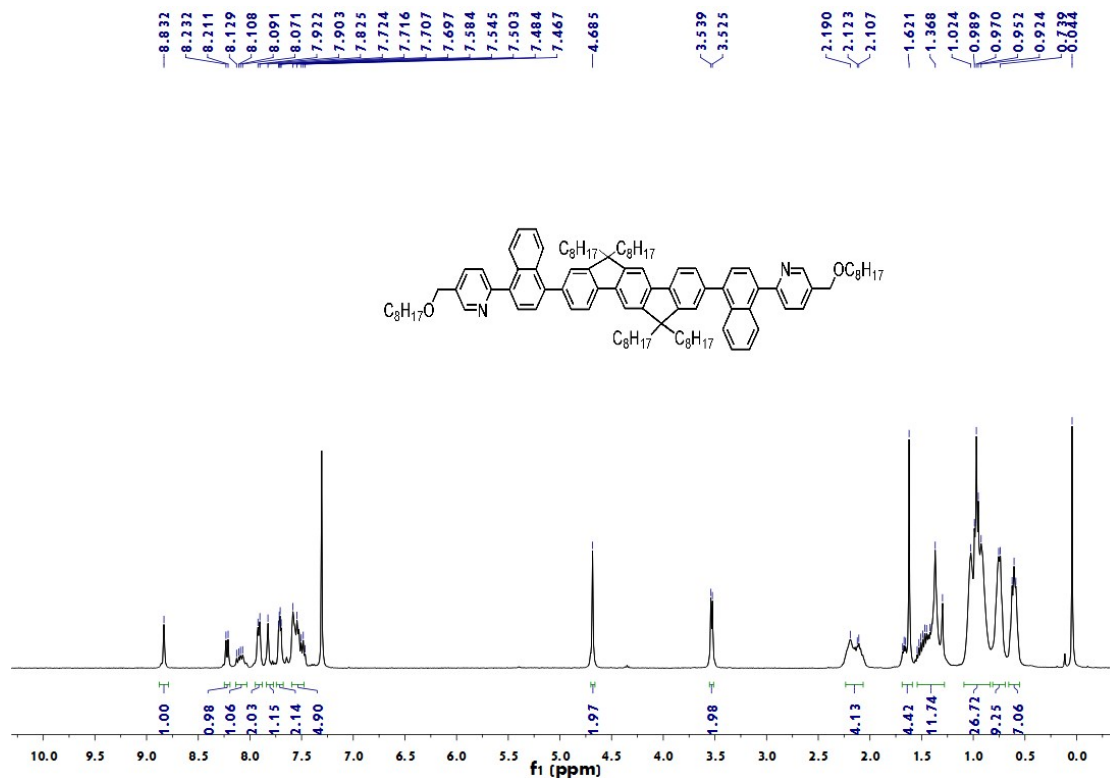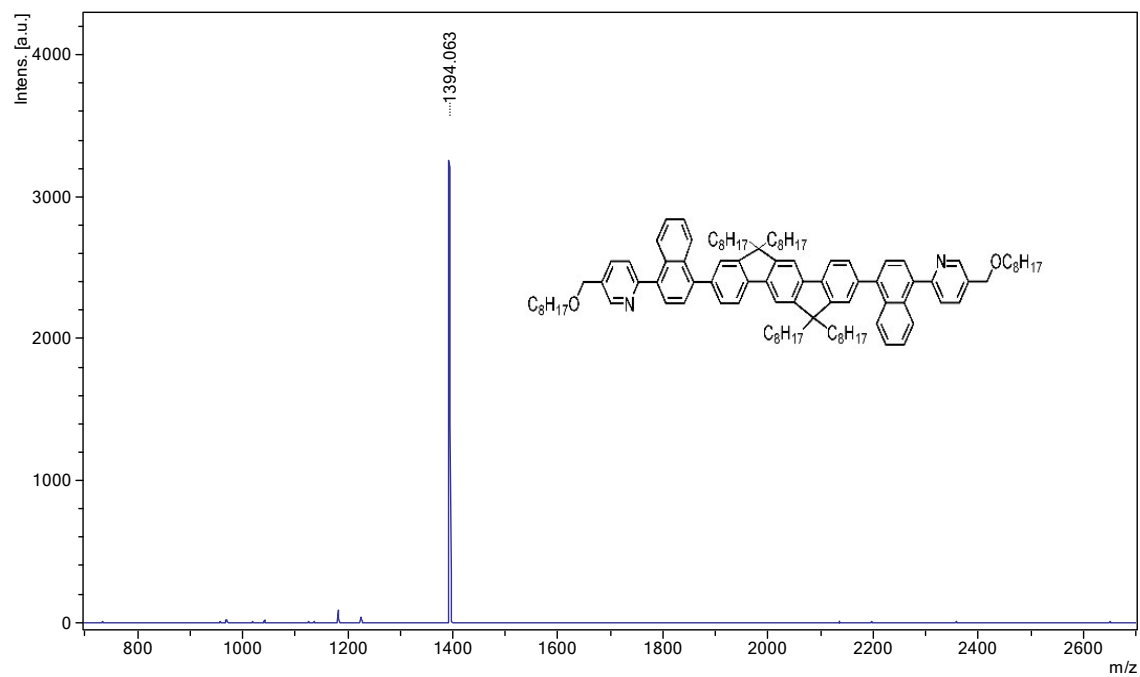

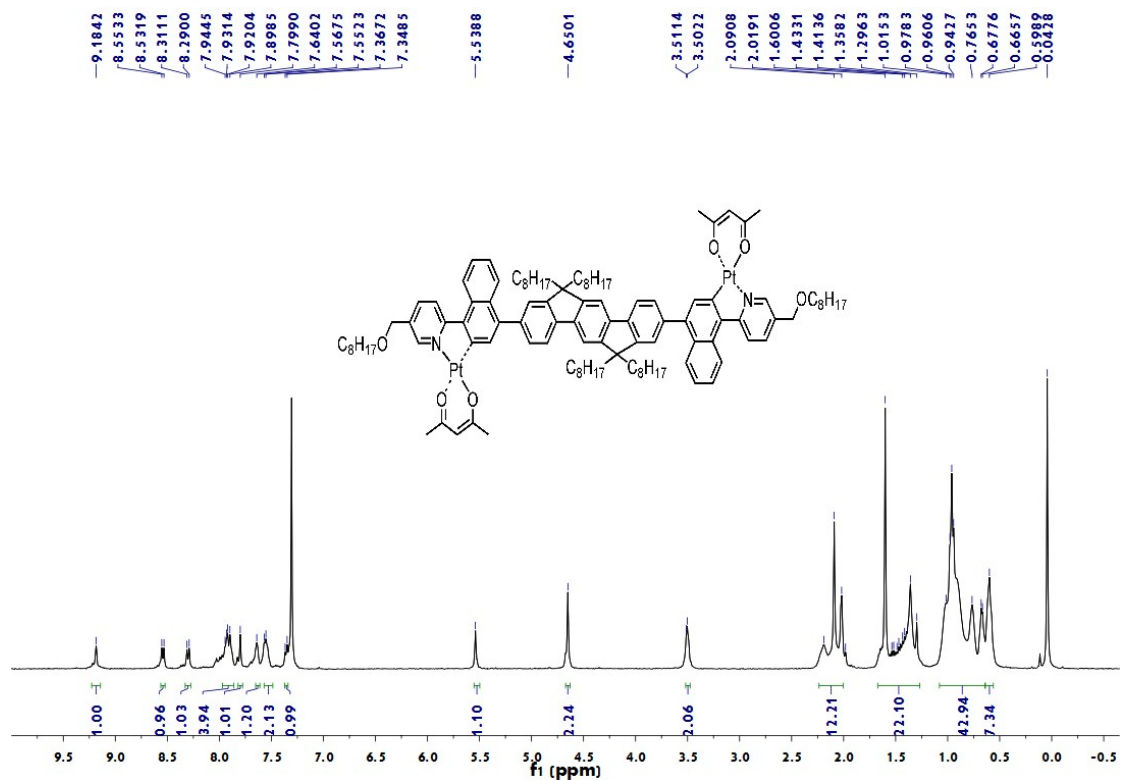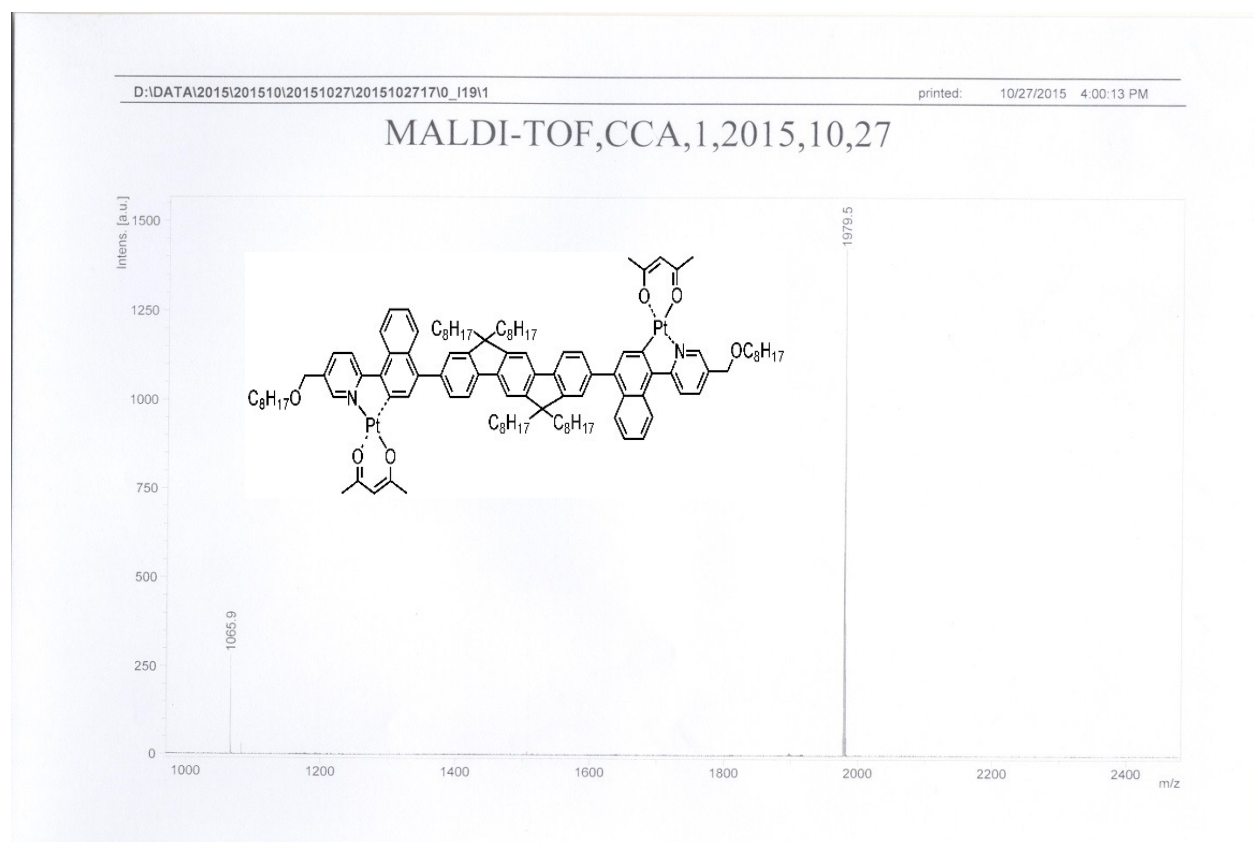

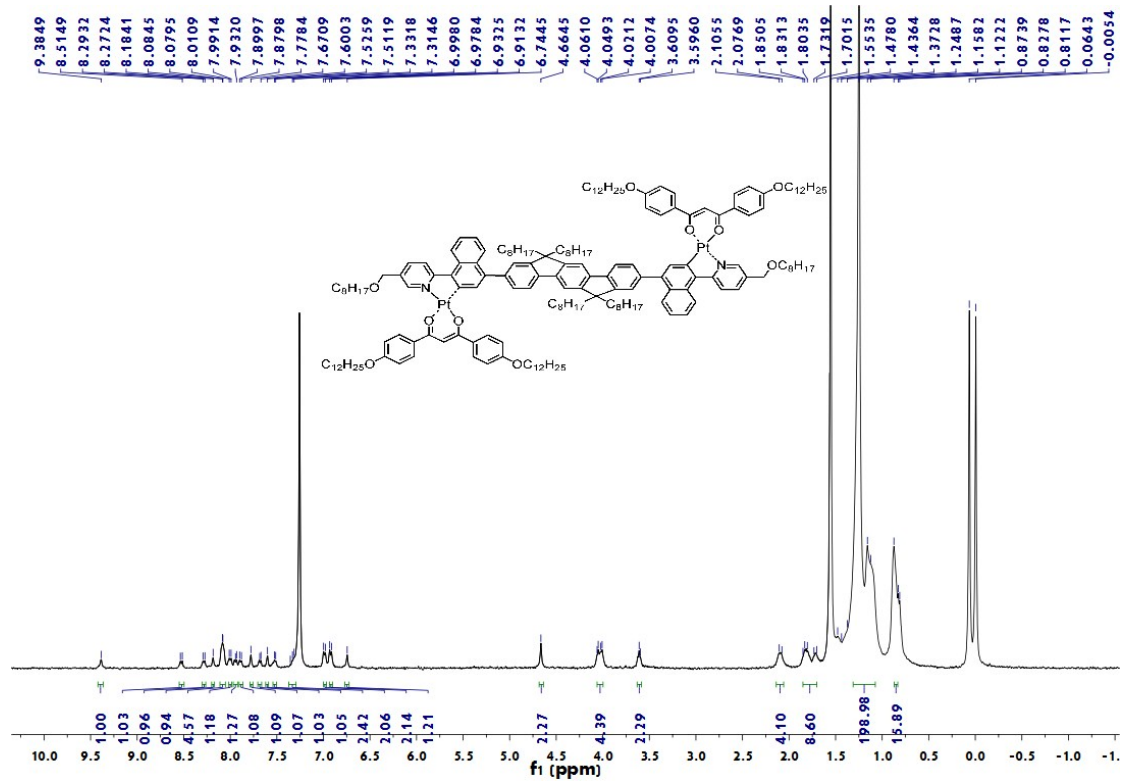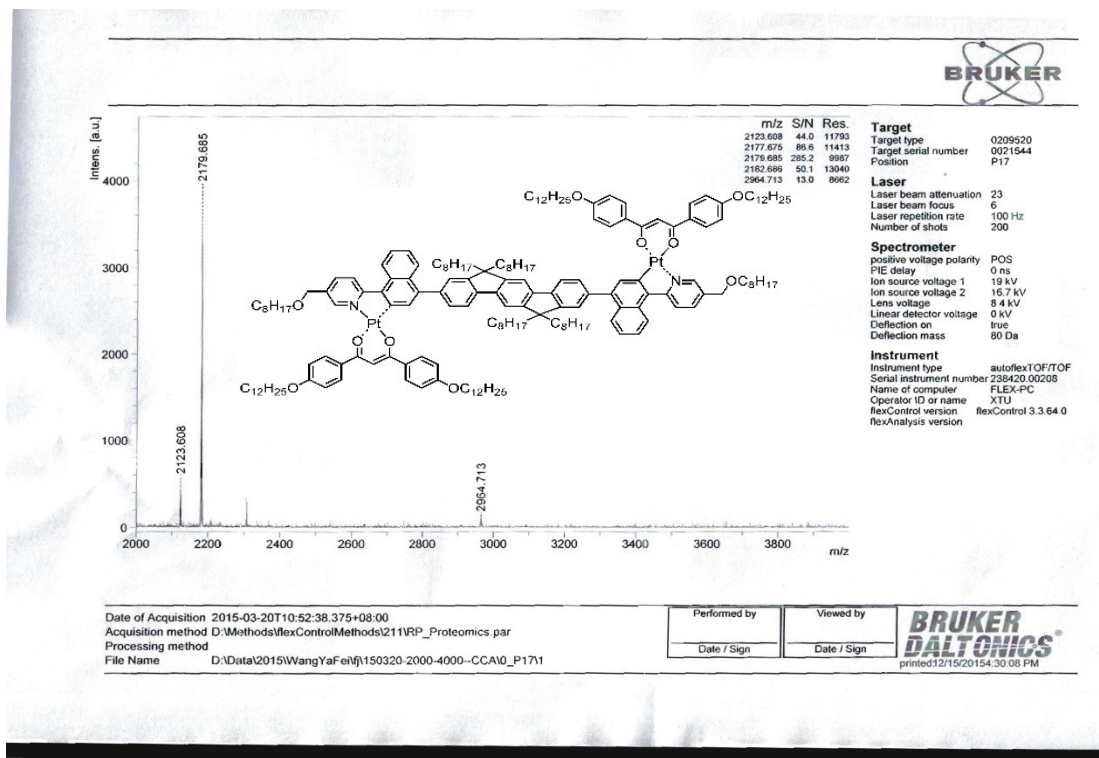

Supplement: c6ra03391a1.pdf [file c6ra03391a1.pdf]
